# Supplementary material
Source: MDPI journal article supplement (https://www.mdpi.com/2311-5637/9/7/672)
Supplement: s1 [file s1]

Archive with 2 entries (2 files):
- supplementary_materials_figures.pdf
- supplementary_materials_tables.xlsx
