# Supplementary material
Source: MDPI journal article supplement (https://www.mdpi.com/2311-5637/9/7/672)
Supplement: s1 [file s1 › supplementary_materials_tables.xlsx]

## Sheet: Table S1
Table S1 Pairwise comparisons using Wilcoxon rank sum exact test.
β-NTI and Treatments
Bacteria	CK	RS	Oa	Nut	Ia
RS	0.161832	NA	NA	NA	NA
Oa	0.161832	0.379406	NA	NA	NA
Nut	0.0489416	0.643561	0.0489416	NA	NA
Ia	0.694621	0.0489416	9.33553e-06	5.20661e-12	NA
Ia_Nut15	0.612407	0.0489416	3.47795e-05	1.48108e-11	0.612407
P value adjustment method: fdr. The red fill indicates significant differences between the two treatments (p<0.05).

## Sheet: Table S2
Table S2 Pairwise comparisons using Wilcoxon rank sum exact test.
β-NTI and Treatments
Fungi	CK	RS	Oa	Nut	Ia
RS	0.136364	NA	NA	NA	NA
Oa	0.160723	0.512906	NA	NA	NA
Nut	0.010808	0.149947	4.02486e-12	NA	NA
Ia	0.00833621	0.149947	4.45586e-10	0.0467872	NA
Ia_Nut15	0.00833621	0.038326	1.9534e-17	0.08462	2.63867e-06
P value adjustment method: fdr. The red fill indicates significant differences between the two treatments (p<0.05).
